# Prolactinomas Resistant to Standard Dopamine Agonists Respond to Chronic Cabergoline Treatment

ANNAMARIA COLAO, ANTONELLA DI SARNO, FRANCESCA SARNACCHIARO,  
DIEGO FERONE, GIANFRANCO DI RENZO, BARTOLOMEO MEROLA,  
LUCIO ANNUNZIATO, AND GAETANO LOMBARDI

*Departments of Molecular and Clinical Endocrinology and Oncology (A.C., A.D.S., F.S., D.F., B.M., G.L.) and Section of Pharmacology, Department of Neuroscience (G.D.R., L.A.), University Federico II, Naples, Italy*

## ABSTRACT

Cabergoline (CAB), a new, potent, and long-lasting PRL-lowering agent, was shown to be effective in tumoral hyperprolactinemia. The aim of this study was to investigate the effectiveness of CAB in patients with prolactinoma proven to be resistant to bromocriptine (BRC) and quinagolide (CV 205–502).

Twenty-seven patients (19 macro- and 8 microprolactinomas) were treated with CAB at a weekly dose of 0.5–3 mg for 3–22 months. All patients were previously shown to be resistant to BRC, and 20 of them were resistant to CV 205–502 as well. Basal serum PRL levels before CAB treatment ranged from 108–3500  $\mu\text{g/L}$  in macroprolactinomas and from 64–205  $\mu\text{g/L}$  in microprolactinomas. Gonadal failure was present in all patients, whereas symptoms of tumor expansion, such as visual field defects and headache, were present in 10 of 27 patients. Eight macroprolactinomas had previously undergone surgery and/or radiotherapy.

CAB treatment normalized serum PRL levels in 15 of 19 macroprolactinomas and in all 8 microprolactinomas. In 3 of the remaining 4 patients it caused a notable decrease in prolactinemia (89%, 80.5%,

and 68.7% of the baseline). Only 1 patient was withdrawn from CAB therapy after 3 months at the weekly dose of 2 mg due to the absence of any significant clinical, hormonal, or radiological improvement. Gonadal function was restored in 18 of 27 patients, galactorrhea disappeared in 5 of 6 women, and headache improved in 7 of 8 patients. A significant tumor shrinkage was detected by computed tomography and/or magnetic resonance imaging in 9 macroprolactinomas and 4 microprolactinomas. CAB was well tolerated by all patients, except 6 who referred slight and short-lasting nausea, postural hypotension, abdominal pain, dizziness, and sleepiness at the beginning of treatment. In particular, CAB was well tolerated by 19 patients previously shown to be poorly tolerant to BRC and CV 205–502.

In conclusion, CAB may represent, at the moment, the only successful therapy for prolactinoma-bearing patients resistant to BRC and CV 205–502, as it normalized PRL levels in 22 of 27 patients, reduced tumor size in 13 of 27 patients, and improved clinical symptoms in 25 of 27 patients in the present study. (*J Clin Endocrinol Metab* 82: 876–883, 1997)

IT HAS BEEN widely recognized in the last 2 decades that medical therapy with dopamine agonists has become the first therapeutic option in prolactinomas (1, 2). Dopamine receptor agonists normalize serum PRL concentrations in about 90% of cases and cause tumor shrinkage in about 60% of prolactinomas (3, 4).

A minority of patients, however, do not respond satisfactorily to the most widely used dopamine agonist, bromocriptine (BRC) (5–7). It has been suggested that the failure of BRC to reduce PRL levels can be the consequence of abnormalities at the dopamine  $D_2$  receptor or at a postreceptor level (7–9). On the other hand, the possibility that a reduction of these high affinity receptors occurs cannot be ruled out (7–9). In line with other reports, we previously observed that a nonergot dopamine agonist, namely quinagolide (CV 205–502), was effective in 24 patients shown to be resistant or intolerant to BRC (10). The effectiveness of this compound has been attributed both to

its specific binding to the dopamine  $D_2$  receptor (9), whereas BRC binds to  $D_1$  and  $D_2$  receptors, and to its higher potency that also allowed treatment of poorly tolerant patients.

In recent years, cabergoline (CAB), a synthetic ergoline, selective and long-lasting  $D_2$  dopamine agonist that inhibits PRL secretion in both healthy and hyperprolactinemic subjects, has been developed. CAB is characterized by a duration of action as long as 21 days after a single oral dose of 0.3–1 mg (11–13). In a multicenter study, 95% of hyperprolactinemic women showed a decrease in serum PRL levels during chronic CAB administration at the dose of 1 mg twice weekly (14). Moreover, CAB has been shown to be more effective and better tolerated than BRC in a multicenter, randomized, 24-week trial in 459 hyperprolactinemic women (15) and in a few patients with macroprolactinoma as well (16).

The aim of the present study was to evaluate whether CAB could represent an effective therapy for patients with prolactinomas previously shown to be resistant to BRC and/or CV 205–502 treatment. The results of the present study showed that CAB is effective in reducing serum PRL levels, in restoring gonadal function and in shrinking tumor mass in the majority of patients.

Received August 28, 1996. Revision received November 8, 1996. Accepted November 15, 1996.

Address all correspondence and requests for reprints to: Annamaria Colao, M.D., Ph.D., Department of Molecular and Clinical Endocrinology and Oncology, Federico II University, via S. Pansini 5, 80131 Naples, Italy.

## Subjects and Methods

### Patients

Twenty-seven patients (9 men and 18 women; age, 15–64 yr) entered this open study after their informed consent had been obtained. Nineteen had macroprolactinoma; 8 had microprolactinoma. Eight macroprolactinoma patients had undergone previous surgery, but hyperprolactinemia and/or residual tumor persisted. Three patients (no. 2–4, Table 1) had been previously irradiated. Before starting CAB treatment, baseline serum PRL levels were  $520.5 \pm 176.6 \mu\text{g/L}$  (range, 180–3500  $\mu\text{g/L}$ ; mean  $\pm$  SEM) in macroprolactinoma patients and  $146 \pm 18.9 \mu\text{g/L}$  (range, 64–212  $\mu\text{g/L}$ ) in microprolactinoma patients. All 27 patients had been treated with BRC, 20 of them had also been given CV 205–502, for 3–12 months before CAB treatment was started. The patient's profile at study entry and serum PRL responses to BRC, CV 205–502, and CAB treatments are shown in Table 1. In line with others (5–7), resistance to BRC, administered in daily doses of 15 mg for at least 3 months, was defined by an absent or poor response in the normalization of PRL levels, the lack of tumor mass shrinkage, or both. Similarly, resistance to CV 205–502 was defined by an absent or poor therapeutic response to a daily dose of 0.6 mg for at least 3 months. BRC and CV 205–502 were discontinued at least 3 weeks before starting CAB therapy in all patients except two (no. 18 and 19, Table 1), who had huge tumors on magnetic resonance imaging (MRI).

Seven men had loss of libido and impotence, whereas 17 women had menstrual disturbances. Six women had spontaneous or provocative galactorrhea. Four patients with macroprolactinoma (2 previously subjected to surgery and radiotherapy) had panhypopituitarism (Table 2).

### Screening, follow-up, and drug treatment schedule

Routine clinical and hormonal evaluations showed no evidence of any thyroid or adrenal abnormalities, except for secondary hypothyroidism and hypocorticism in 4 patients with panhypopituitarism (Table 2). These patients received a standard replacement therapy with L-T<sub>4</sub> and cortisone acetate before starting CAB therapy. Before treatment, the average PRL levels was calculated on the basis of a 6-h time course with hourly sampling (0800–1400 h). After 15, 30, 60, 90, 180, and 360 days of treatment, serum PRL levels were assayed at 0800 h in a single sample. A general clinical examination was performed every month. CAB therapy was started at a dose of 0.25 mg once weekly for the first week, twice weekly during the second week, and then 0.5 mg twice weekly. Starting from the second month of treatment, adjustment of the dose was carried out on the basis of serum PRL suppression. Thus, the dose of CAB was progressively increased up to 1 mg twice weekly in seven patients and up to 1.75 mg (0.25 mg daily) in one patient (no. 12) after 6 months of treatment. In two other patients (no. 4 and 6) the dose was further increased up to 3 mg/week after 3 months of treatment; initially, the dose was given twice weekly and then 0.5 mg/day, 6 days/week.

### Radiological imaging

The MRI was carried out using a superconductive magnetic resonance (0.5–1.0 Tesla) and superficial coil in axial, coronal, and sagittal sections. The acquisitions were spin echo with a 1000-msec repetition time and a 40- to 120-ms echo time of 21 msec. MRI was performed before and after 6 and 12 months of CAB administration. In two nonoperated macroprolactinomas, MRI was also carried out after 3 months of treatment. Tumor shrinkage, documented by MRI scan, was quantified in a semiquantitative way as follows: absent, less than 25% as not significant, 25–50% as moderate, and greater than 50% as notable tumor size reduction of pretreatment size.

### Visual field

Visual field examination was performed with the Goldmann-Friedmann perimetry. Visual field assessment was carried out in all patients before CAB administration and again every 6 months in patients with visual field defects.

### Assay

Serum PRL levels were assessed by RIA using commercial kits (Radim, Pomezia, Italy). The intra- and interassay coefficients of vari-

ation for PRL were 5% and 7%, respectively. The normal range for PRL was below 20  $\mu\text{g/L}$ .

### Statistical analysis

Data were expressed as the mean  $\pm$  SEM. Statistical analysis was performed by ANOVA, followed by the Newman-Keuls test where appropriate. The significance was set at 5%.

## Results

The responses of serum PRL to BRC, CV 205–502, and CAB in the 27 patients are reported in Table 1. Previous therapy with BRC and CV 205–502 significantly reduced serum PRL levels before CAB therapy was started; however, normoprolactinemia was never reached, although a significant tumor shrinkage was obtained in 4 patients (no. 1, 10, 16, and 19). In both macro- and microprolactinomas, BRC and CV 205–502 treatments induced a similar percent inhibition of serum PRL concentrations, whereas CAB treatment induced a significantly greater percent inhibition of serum PRL concentrations (Fig. 1).

### Effect of CAB treatment on serum PRL levels (Table 1)

CAB administration for 1–6 months normalized serum PRL levels in 9 of 19 macroprolactinomas (Fig. 2) and in all 8 microprolactinomas (Fig. 3). Moreover, CAB notably decreased PRL levels in 9 of the remaining 10 patients. In the last patient (no. 18, Table 2), CAB therapy was withdrawn after 3 months because of the absence of any significant change in the clinical, hormonal, or radiological picture. After 1 yr of CAB therapy, serum PRL concentrations remained suppressed in all of these 17 patients and were normalized in three other patients (no. 6, 9, and 10, Table 2). Furthermore, serum PRL levels reached values close to the normal range in another three patients (no. 1, 5, and 12, Table 2). Two of these patients (no. 5 and 12) normalized serum PRL levels after 18 months of treatment. In all of the patients, the percentage of PRL decrease during CAB treatment was significantly greater than that during BRC or CV 205–502 treatment (Fig. 1).

### Effect of CAB treatment on clinical symptoms (Table 2)

Improvement of gonadal failure and headache was observed in 18 of 27 patients and in 7 of 8 patients, respectively. Menses resumed in all women except 4; 2 (no. 4 and 23) remained oligomenorrheic, 1 with primary amenorrhea (no. 6) remained amenorrheic, and 1 (no. 26) had early menopause, as diagnosed by progressively increased FSH and LH levels. Galactorrhea disappeared in all 6 patients. Improvement of sexual potency was reported by 7 adult men after 1–6 months of treatment.

### MRI results

CAB treatment induced a tumor shrinkage of 25% or more of the pretreatment size in six macroprolactinoma patients and one microprolactinoma patient and of more than 50% in two macroprolactinoma and three microprolactinoma patients that completely disappeared at MRI after 1 yr of CAB treatment. In two macroprolactinoma patients, shrinkage was evident after as early as 3 months of therapy (no. 6, Fig.

**TABLE 1.** Effect of chronic administration of bromocriptine, CV 205-502, and cabergoline on serum PRL levels and tumor mass in the 27 patients

| Patient sex,<br>age (yr)  | Response to bromocriptine therapy    |                   |                                                 |                | Response to CV 205-502 therapy       |        |                                                 |                   | Response to cabergoline therapy      |        |                                                 |       |
|---------------------------|--------------------------------------|-------------------|-------------------------------------------------|----------------|--------------------------------------|--------|-------------------------------------------------|-------------------|--------------------------------------|--------|-------------------------------------------------|-------|
|                           | Serum PRL levels ( $\mu\text{g/L}$ ) |                   | Tumor shrinkage<br>(% of pretreatment<br>value) | Nadir          | Serum PRL levels ( $\mu\text{g/L}$ ) |        | Tumor shrinkage<br>(% of pretreatment<br>value) | Nadir             | Serum PRL levels ( $\mu\text{g/L}$ ) |        | Tumor shrinkage<br>(% of pretreatment<br>value) | Nadir |
|                           | Basal                                | Nadir             |                                                 |                | Basal                                | Nadir  |                                                 |                   | Basal                                | Nadir  |                                                 |       |
| <b>Macrolactinomas</b>    |                                      |                   |                                                 |                |                                      |        |                                                 |                   |                                      |        |                                                 |       |
| 1. M,15                   | 150                                  | 61                | >50                                             | 165            | 46                                   | Absent | 20                                              | 143               | 20                                   | Absent | Absent                                          | 20    |
| 2. M,15 <sup>S,RT</sup>   | 1600                                 | 185               | Absent                                          | 870            | 44                                   | Absent | 8.6                                             | 491               | 8.6                                  | Absent | <25                                             | 8.6   |
| 3. M,16 <sup>S,RT</sup>   | 731                                  | 540               | Absent                                          | 646            | 211                                  | Absent | 15                                              | 512               | 15                                   | Absent | 25-50                                           | 15    |
| 4. F,17 <sup>RT</sup>     | 563                                  | 234               | Absent                                          | 685            | 279                                  | Absent | 50.7                                            | 473               | 50.7                                 | Absent | <25                                             | 50.7  |
| 5. F,17 <sup>S</sup>      | 200                                  | 75                | Absent                                          | /              | /                                    | /      | 16.9                                            | 205               | 16.9                                 | /      | 25-50                                           | 16.9  |
| 6. F,21                   | 140                                  | 40                | Absent                                          | 150            | 49                                   | Absent | <25                                             | 110               | 16.7                                 | <25    | 25-50                                           | 16.7  |
| 7. F,23                   | 241                                  | 68                | Absent                                          | 273            | 40                                   | Absent | 0.1                                             | 230               | 0.1                                  | <25    | 25-50                                           | 0.1   |
| 8. F,25 <sup>S</sup>      | 336                                  | 119               | <25                                             | 497            | 58                                   | Absent | 19.9                                            | 293               | 19.9                                 | Absent | 25-50                                           | 19.9  |
| 9. M,26 <sup>S</sup>      | 380                                  | 130               | Absent                                          | 222            | 174                                  | Absent | 265                                             | 265               | 19.9                                 | Absent | Absent                                          | 19.9  |
| 10. F,28                  | 1348                                 | 99                | 25-50                                           | 958            | 125                                  | Absent | 724                                             | 724               | 8.9                                  | Absent | Absent                                          | 8.9   |
| 11. F,28                  | 196                                  | 52                | Absent                                          | 202            | 70                                   | Absent | <25                                             | 271               | 0.2                                  | <25    | >50                                             | 0.2   |
| 12. M,30 <sup>S</sup>     | 1346                                 | 370               | Absent                                          | 443            | 67                                   | Absent | 19.5                                            | 632               | 19.5                                 | Absent | 25-50                                           | 19.5  |
| 13. F,31                  | 193                                  | 76                | Absent                                          | 135            | 66                                   | Absent | 47                                              | 241               | 47                                   | Absent | >50                                             | 47    |
| 14. F,34                  | 93                                   | 50                | <25                                             | 131            | 74                                   | Absent | 0.5                                             | 108               | 0.5                                  | Absent | >50                                             | 0.5   |
| 15. F,35 <sup>S</sup>     | 138                                  | 100               | Absent                                          | 136            | 170                                  | Absent | 56.3                                            | 180               | 56.3                                 | Absent | Absent                                          | 56.3  |
| 16. M,41                  | 210                                  | 31                | >50                                             | /              | /                                    | /      | 8                                               | 176               | 8                                    | /      | Absent                                          | 8     |
| 17. M,51 <sup>S</sup>     | 242                                  | 51                | Absent                                          | 351            | 44                                   | Absent | 254                                             | 254               | 6.2                                  | Absent | Absent                                          | 6.2   |
| 18. M,52                  | 4000                                 | 2200              | Absent                                          | /              | /                                    | /      | 2000                                            | 3500              | 2000                                 | /      | Absent                                          | 2000  |
| 19. M,64                  | 973                                  | 452               | >50                                             | /              | /                                    | /      | 0.1                                             | 1182              | 0.1                                  | /      | Absent                                          | 0.1   |
| Mean $\pm$ SEM            | 688.4 $\pm$ 213.5                    | 259.6 $\pm$ 112.9 |                                                 | 388 $\pm$ 84.3 | 140.5 $\pm$ 32.1                     |        | 520.5 $\pm$ 176.6                               | 121.8 $\pm$ 104.4 |                                      |        |                                                 |       |
| <b>Microprolactinomas</b> |                                      |                   |                                                 |                |                                      |        |                                                 |                   |                                      |        |                                                 |       |
| 20. F,21                  | 194                                  | 45                | Absent                                          | 131            | 47                                   | Absent | 15.8                                            | 166               | 15.8                                 | Absent | 25-50                                           | 15.8  |
| 21. F,23                  | 160                                  | 31                | Absent                                          | 150            | 47                                   | Absent | 16.8                                            | 184               | 16.8                                 | Absent | >50                                             | 16.8  |
| 22. F,24                  | 95                                   | 27                | Absent                                          | /              | /                                    | /      | 2.1                                             | 93                | 2.1                                  | Absent | >50                                             | 2.1   |
| 23. F,25                  | 75                                   | 51                | Absent                                          | /              | /                                    | /      | 19                                              | 64                | 19                                   | Absent | Absent                                          | 19    |
| 24. F,26                  | 151                                  | 47                | Absent                                          | 143            | 73                                   | Absent | 6.2                                             | 212               | 6.2                                  | Absent | <25                                             | 6.2   |
| 25. F,33                  | 120                                  | 53                | Absent                                          | 230            | 96                                   | Absent | 4                                               | 131               | 4                                    | Absent | <25                                             | 4     |
| 26. F,40                  | 144                                  | 70                | Absent                                          | 136            | 77                                   | Absent | 0.1                                             | 123               | 0.1                                  | Absent | >50                                             | 0.1   |
| 27. F,52                  | 250                                  | 35                | Absent                                          | /              | /                                    | /      | 16                                              | 205               | 16                                   | Absent | Absent                                          | 16    |
| Mean $\pm$ SEM            | 148.6 $\pm$ 19.6                     | 44.9 $\pm$ 4.9    |                                                 | 158 $\pm$ 18.3 | 68 $\pm$ 9.4                         |        | 146 $\pm$ 18.9                                  | 10 $\pm$ 2.7      |                                      |        |                                                 |       |

Superscript labels: S, surgery; RT, radiotherapy. M, male; F, female. Tumor shrinkage at MRI was quantified semiquantitatively as follows: absent, <25% as not significant; 25-50% as moderate, >50% as notable.

**TABLE 2.** Time course of the effect of chronic cabergoline administration on PRL levels, tumor size, and clinical symptoms in the 27 patients

| Patient no. | Response to cabergoline therapy |                   |                     |                       | Radiological findings <sup>a</sup> |                   |                       | Symptomatology     |                   |                       |
|-------------|---------------------------------|-------------------|---------------------|-----------------------|------------------------------------|-------------------|-----------------------|--------------------|-------------------|-----------------------|
|             | Dose (mg/week)                  | Duration (months) | Nadir of PRL (μg/L) | Obtained after months | Before cabergoline                 | After cabergoline | Obtained after months | Before cabergoline | After cabergoline | Obtained after months |
| 1           | 1                               | 17                | 20                  | 17                    | Empty sella                        | Unchanged         | 12                    | H                  | None              | 2                     |
| 2           | 1                               | 17                | 8.6                 | 3                     | Residual tumor                     | Unchanged         | 12                    | PHP, VFD           | PHP               | 6                     |
| 3           | 2                               | 24                | 15                  | 16                    | Residual tumor                     | Shrinkage         | 12                    | PHP                | PHP               | /                     |
| 4           | 3                               | 8                 | 50.7                | 7                     | Intrasellar MP                     | Unchanged         | 6                     | A                  | O                 | 6                     |
| 5           | 1                               | 8                 | 16.9                | 8                     | Residual tumor                     | Shrinkage         | 6                     | A**,G,H            | A,H               | 3                     |
| 6           | 3                               | 12                | 16.7                | 5                     | Intrasellar MP                     | Shrinkage         | 6                     | A                  | None              | 3                     |
| 7           | 1                               | 14                | 0.1                 | 6                     | Intrasellar MP                     | Shrinkage         | 6                     | A                  | None              | 2                     |
| 8           | 1                               | 14                | 19                  | 5                     | Residual tumor                     | Shrinkage         | 9                     | A                  | None              | 2                     |
| 9           | 2                               | 21                | 19.9                | 14                    | Residual tumor                     | Unchanged         | 12                    | L-P failure        | None              | 6                     |
| 10          | 1                               | 18                | 8.9                 | 15                    | Intrasellar MP                     | Unchanged         | 12                    | A                  | None              | 5                     |
| 11          | 1                               | 13                | 0.2                 | 6                     | Suprasellar MP                     | Shrinkage         | 6                     | H,A                | None              | 3                     |
| 12          | 1.75                            | 15                | 19.5                | 15                    | Empty sella                        | Unchanged         | 12                    | L-P failure        | None              | 5                     |
| 13          | 2                               | 14                | 47                  | 8                     | Suprasellar MP                     | Shrinkage         | 3                     | A                  | None              | 5                     |
| 14          | 1                               | 13                | 0.5                 | 7                     | Intrasellar MP                     | Shrinkage         | 6                     | A,G                | None              | 6                     |
| 15          | 2                               | 7                 | 56.3                | 3                     | Empty sella                        | Unchanged         | 6                     | A                  | None              | 3                     |
| 16          | 1                               | 12                | 8                   | 6                     | Intrasellar MP                     | Unchanged         | 9                     | H                  | None              | 2                     |
| 17          | 1                               | 12                | 6.2                 | 4                     | Empty sella                        | Unchanged         | 12                    | H, L-P failure     | None              | 4                     |
| 18          | 2                               | 3                 | 2000                | 0.5                   | Extrasellar MP                     | Unchanged         | 3                     | PHP, VFD           | PHP, VFD          | /                     |
| 19          | 1                               | 14                | 0.1                 | 2                     | Extrasellar MP                     | Unchanged         | 12                    | PHP, VFD           | PHP               | 6                     |
| 20          | 1                               | 18                | 15.8                | 16                    | 7 mm mp                            | Shrinkage         | 12                    | A,G                | None              | 6                     |
| 21          | 1                               | 14                | 16.8                | 6                     | 7 mm mp                            | Shrinkage         | 9                     | H,A                | None              | 6                     |
| 22          | 0.5                             | 10                | 2.1                 | 2                     | 5 mm mp                            | Shrinkage         | 6                     | A                  | None              | 2                     |
| 23          | 0.5                             | 13                | 19                  | 12                    | 3 mm mp                            | Unchanged         | 12                    | A,G                | O                 | 6                     |
| 24          | 1                               | 12                | 6.2                 | 3                     | 10 mm mp                           | Unchanged         | 12                    | A,G                | None              | 3                     |
| 25          | 0.5                             | 16                | 4                   | 8                     | 6 mm mp                            | Unchanged         | 12                    | H,A                | None              | 6                     |
| 26          | 1                               | 18                | 0.1                 | 3                     | 6 mm mp                            | Shrinkage         | 12                    | H,A,G              | Menopause         | 12                    |
| 27          | 1                               | 7                 | 16                  | 6                     | 8 mm mp                            | Unchanged         | 6                     | Menopausal age     | /                 | /                     |

<sup>a</sup> The maximal diameter of microadenomas is shown in millimeters.

MP, macroprolactinoma; mp, microprolactinoma; PHP, panhypopituitarism; VFD, visual field defects; A, amenorrhea; A\*\*, primary amenorrhea; L-P failure, libido and potency failure; H, headache; G, galactorrhea.

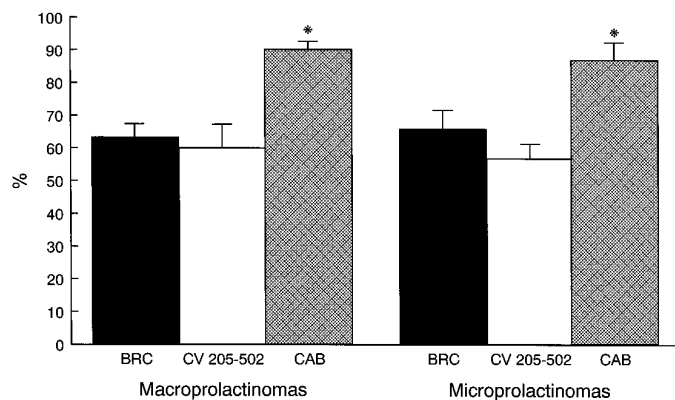

**FIG. 1.** Percentage of decrease in serum PRL during BRC, CV 205–502, and CAB therapies in macroprolactinoma and microprolactinoma patients. \*, *P* < 0.01 vs. BRC and CV 205–502 treatments.

4, and 13) despite the persistence of moderate hyperprolactinemia. In addition, shrinkage was documented in a patient (no. 3) resistant to previous surgery, radiotherapy, and 5-yr treatment with BRC and CV 205–502.

**Tolerability**

As shown in Table 3, CAB was well tolerated. Six of 27 patients reported mild and short-lasting side-effects that con-

sisted of nausea, postural hypotension, abdominal pain, sleepiness, and dizziness. These side-effects disappeared spontaneously during the second week of treatment. No patient was withdrawn from CAB therapy for side-effects. CAB was optimally tolerated by 16 patients who had reported side-effects during previous BRC and CV 205–502 treatments.

**Discussion**

The results of the present open study showed that prolactinomas hyporesponsive to standard dopamine agonists respond to chronic CAB treatment. Particularly, CAB brought down serum PRL to normal values and caused the restoration of gonadal function in 70% of patients in which BRC and CV 205–502 had been unable to normalize serum PRL levels and gonadal function despite long term and high dose treatments. Furthermore, CAB induced a significant shrinkage in tumor mass in eight macroprolactinoma patients and four microprolactinoma patients in which BRC and CV 205–502 treatment had failed.

At present, the molecular mechanism underlying the resistance to BRC and/or CV 205–502 is not fully elucidated. Pellegrini *et al.* (8) showed that in some patients bearing BRC-resistant macroprolactinomas there was a marked decrease in the density of high affinity D<sub>2</sub> dopamine receptor-binding sites in tumor lactotrophs. As CAB

FIG. 2. Serum PRL profile before and during CAB therapy in the 19 macroprolactinoma-bearing patients. Patients are numbered in line with tables. The broken line indicates the upper limit of the normal range.

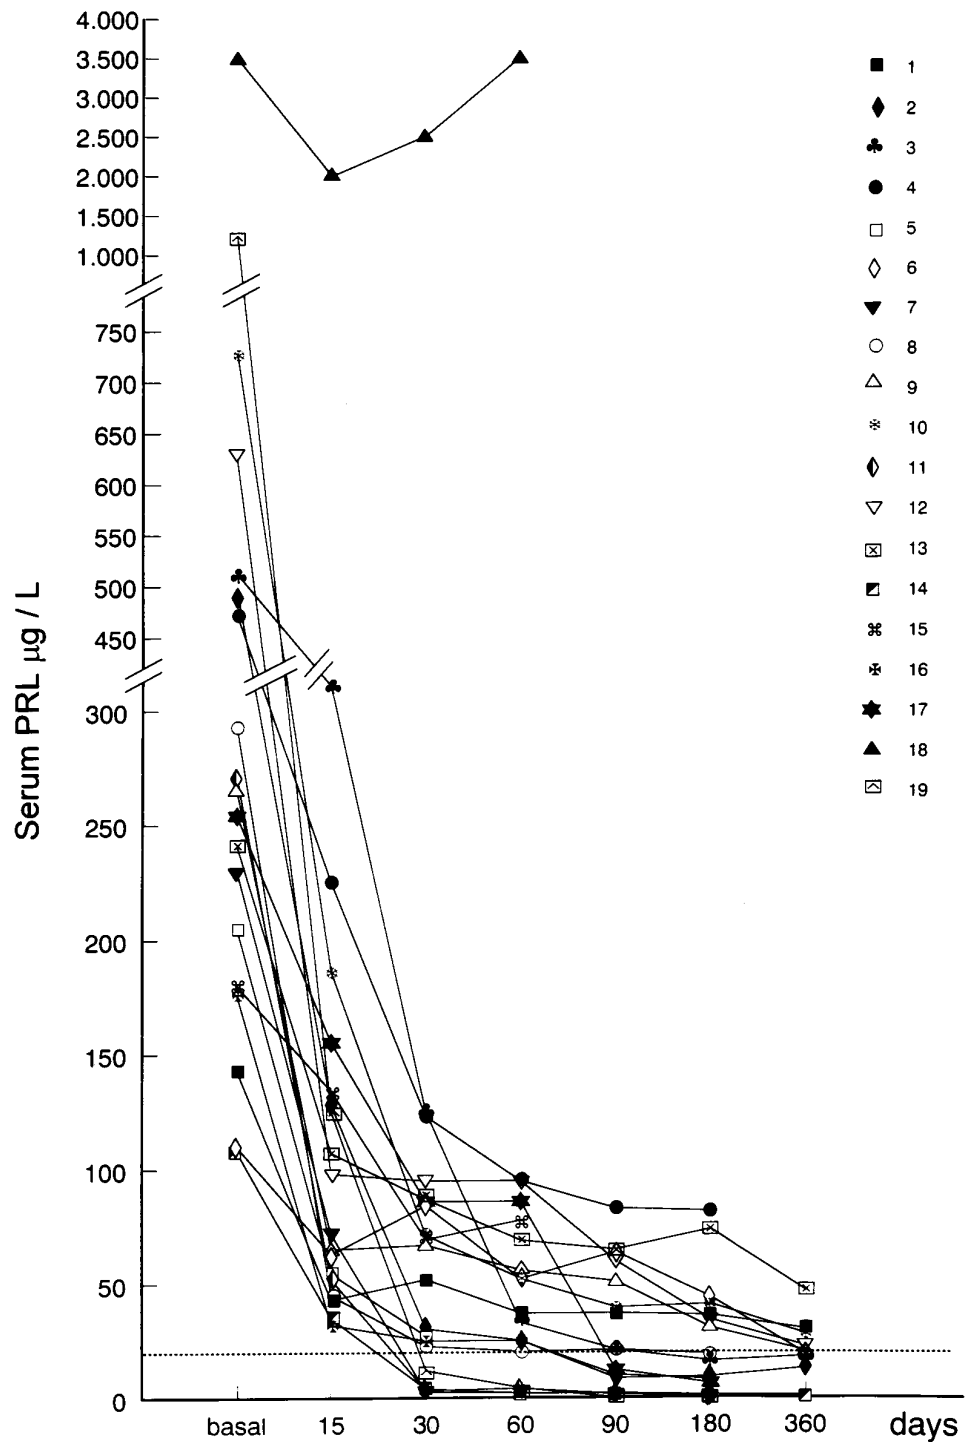

has been shown to possess a higher affinity for dopamine-binding sites in rat striatum compared to BRC (16), it is possible that a higher affinity in resistant prolactinomas may account for CAB effectiveness. Moreover, the comparative time-course analysis of the regional inhibition of [ $^3$ H]*N-n*-propylnoramorphine-binding receptors in different rat brain areas, such as striatum, olfactory tubercles, thalamus and hypothalamus, and adeno- and neurohy-

pophysis, showed that CAB occupied  $D_2$  receptor for a longer time than did BRC (16). Further studies in the rat striatum and adenohypophysis showed that CAB receptor occupancy was dose dependent and still detectable 72 h after iv administration (16). Another important finding is that CAB reduces the size of the estradiol-induced PRL-secreting tumor in the rat (17) and *de novo* PRL synthesis (18) to a greater extent than does BRC. On the other hand,

FIG. 3. Serum PRL profile before and during CAB therapy in the eight microprolactinoma-bearing patients. Patients are numbered in line with tables. The *broken line* indicates the upper limit of the normal range.

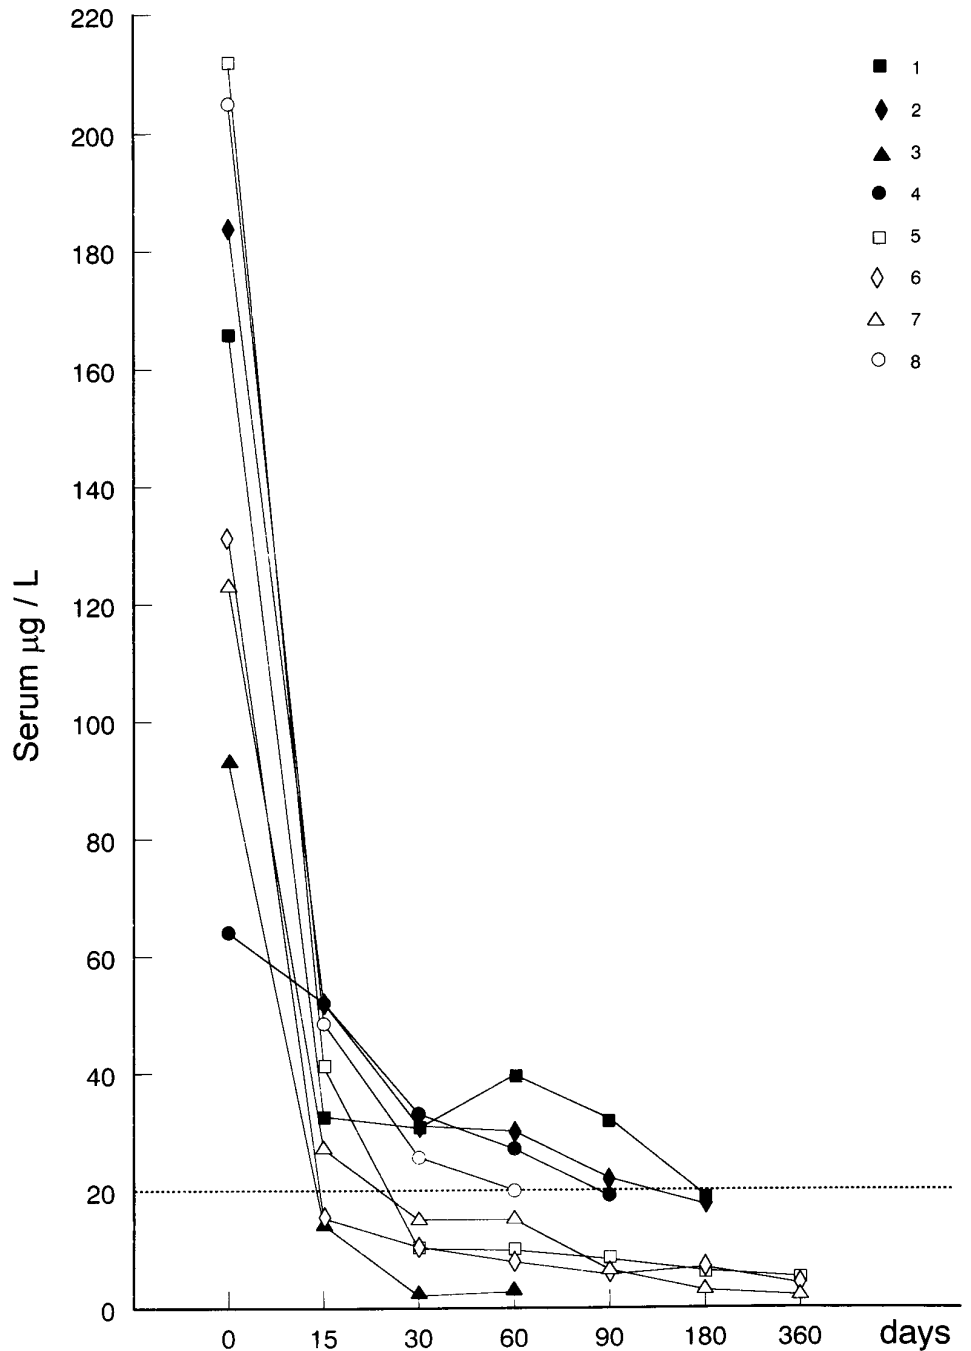

the possibility exists that the peculiar pharmacokinetic profile of CAB, characterized by a prolonged half-life and a notably slow elimination from highly perfused tissues such as the pituitary (11), could be responsible at least in part for the effectiveness of CAB in resistant patients. Finally, another point not to disregard when explaining the effectiveness of CAB compared to those of BRC and CV 205-502 is the greater tolerability of this new ergoline derivative. In fact, this pharmacological property made it possible to increase the weekly dose of CAB in 40% of hyporesponsive macroprolactinomas and conse-

quently enhanced the success rate of this therapy. This aspect is of crucial relevance in the chronic treatment of prolactinomas, because the appearance of side-effects can preclude the achievement of an effective dose with consequent persistence of the hyperprolactinemic syndrome.

In conclusion, the results of this study indicate that CAB might be a valid, safe, and well tolerated therapy in patients proven to be resistant or even hyporesponsive to high doses of other dopaminergic agents, including BRC and CV 205-502.

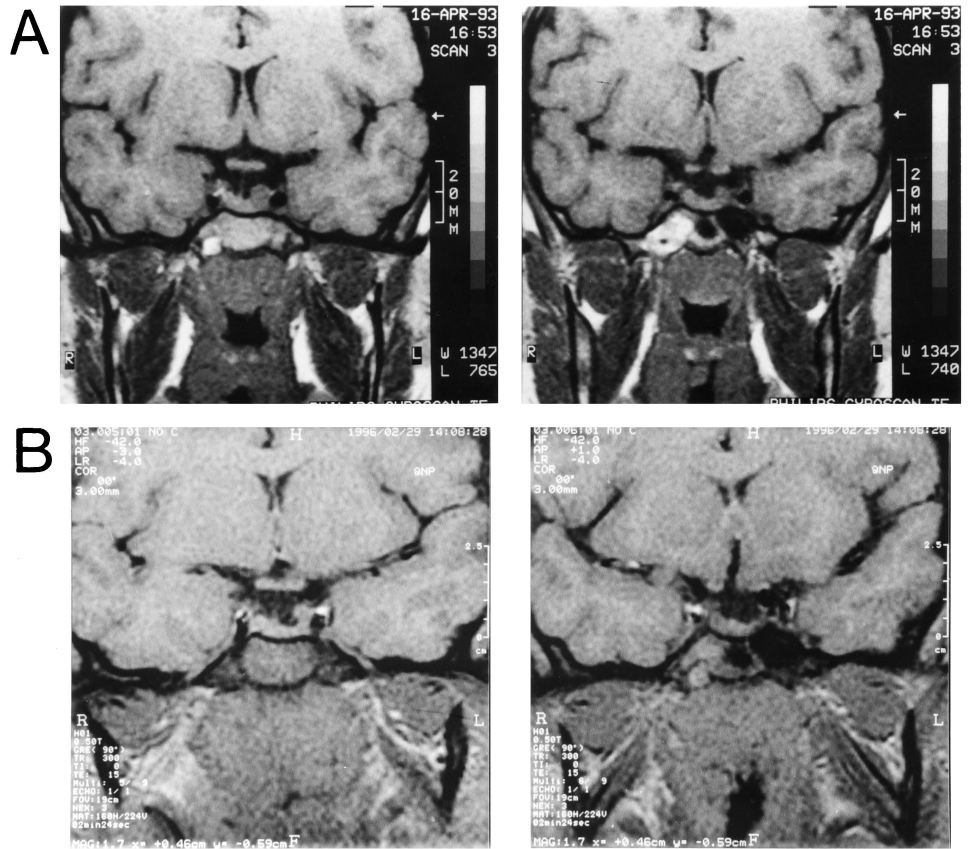

FIG. 4. MRI before (A) and after 3 months of CAB treatment (B) in a patient with macroprolactinoma (no. 6, Tables 1–3). Shrinkage was evident in two different coronal sections.

**TABLE 3.** Comparison of tolerability to the chronic bromocriptine, CV 205-502 and cabergoline treatment in the 27 patients

| Patient no. | Bromocriptine                                    | CV 205-502                                       | Cabergoline     |
|-------------|--------------------------------------------------|--------------------------------------------------|-----------------|
| 1           | V <sup>2</sup>                                   | V <sup>2</sup>                                   | None            |
| 2           | N <sup>1</sup> , V <sup>2</sup>                  | AP <sup>1</sup> , N <sup>2</sup>                 | D <sup>1</sup>  |
| 3           | P <sup>2</sup> , AP <sup>2</sup>                 | AP <sup>1</sup>                                  | AP <sup>1</sup> |
| 4           | V <sup>2</sup>                                   | AP <sup>1</sup> , D <sup>1</sup>                 | None            |
| 5           | N <sup>1</sup>                                   | N <sup>1</sup>                                   | None            |
| 6           | V <sup>2</sup> , P <sup>2</sup>                  | P <sup>2</sup>                                   | S <sup>2</sup>  |
| 7           | P <sup>2</sup>                                   | A <sup>2</sup>                                   | None            |
| 8           | N <sup>1</sup> , V <sup>1</sup> , P <sup>1</sup> | N <sup>1</sup> , A <sup>2</sup>                  | None            |
| 9           | N <sup>1</sup> , V <sup>1</sup> , P <sup>2</sup> | P <sup>1</sup>                                   | None            |
| 10          | None                                             | None                                             | None            |
| 11          | N <sup>1</sup>                                   | None                                             | None            |
| 12          | N <sup>1</sup> , V <sup>1</sup> , S <sup>1</sup> | S <sup>1</sup>                                   | None            |
| 13          | N <sup>1</sup>                                   | None                                             | None            |
| 14          | V <sup>2</sup> , P <sup>1</sup>                  | V <sup>1</sup>                                   | None            |
| 15          | N <sup>1</sup> , V <sup>2</sup>                  | N <sup>1</sup>                                   | P <sup>1</sup>  |
| 16          | N <sup>1</sup> , V <sup>2</sup>                  | D <sup>2</sup> , P <sup>1</sup> , S <sup>1</sup> | None            |
| 17          | P <sup>2</sup> , N <sup>1</sup>                  | P <sup>1</sup>                                   | N <sup>1</sup>  |
| 18          | S <sup>2</sup>                                   | None                                             | None            |
| 19          | N <sup>2</sup> , S <sup>2</sup>                  | S <sup>3</sup>                                   | N <sup>1</sup>  |
| 20          | AP <sup>2</sup>                                  | None                                             | None            |
| 21          | P <sup>2</sup>                                   | P <sup>1</sup>                                   | None            |
| 22          | None                                             | /                                                | None            |
| 23          | None                                             | /                                                | None            |
| 24          | V <sup>2</sup>                                   | AP <sup>1</sup> , S <sup>1</sup>                 | None            |
| 25          | V <sup>3</sup> , P <sup>2</sup>                  | P <sup>2</sup>                                   | None            |
| 26          | N <sup>2</sup>                                   | N <sup>1</sup> , S <sup>2</sup>                  | None            |
| 27          | N <sup>1</sup>                                   | /                                                | None            |

A, Anorexia; AP, abdominal pain; D, dizziness; N, nausea; P, postural hypotension; S, sleepiness; V, vomiting. Superscript score of side-effects: 1 = mild; 2 = moderate; 3 = severe.

## References

1. Thorner MO, McNeilly AS, Hagan C, Besser GM. 1974 Long-term treatment of galactorrhea and hypogonadism with bromocriptine. *Br Med J*. 2:419–422.
2. Molitch ME, Elton RL, Blackwell RE, et al. 1985 Bromocriptine as primary therapy for prolactin-secreting macroadenomas: results of a prospective multicentric study. *J Clin Endocrinol Metab*. 60:698–705.
3. Chiodini GP, Liuzzi A, Cozzi R, et al. 1981 Size reduction of macroprolactinomas by bromocriptine or lisuride treatment. *J Clin Endocrinol Metab*. 53:737–743.
4. Colao A, Merola B, Sarnacchiaro F, et al. 1995 Comparison among different dopamine-agonists of new formulation in the clinical management of macroprolactinoma. *Horm Res*. 44:222–228.
5. Duranteau L, Chanson P, Lavoinne A, Horlait S, Lubetski J, Kuhn JM. 1991 Effects of new dopaminergic agonist CV 205–502 on plasma PRL levels and tumor size in BRC-resistant prolactinomas. *Clin Endocrinol (Oxf)*. 34:25–29.
6. Razaq R, O'Halloran DJ, Beardwell CG, Shalet SM. 1993 The effects of CV 205–502 in patients with hyperprolactinemia intolerant and/or resistant to bromocriptine. *Horm Res*. 39:218–222.
7. Brue T, Pellegrini I, Gunz G, et al. 1992 Effects of dopamine agonists CV 205–502 in human prolactinomas resistant to bromocriptine. *J Clin Endocrinol Metab*. 74:577–584.
8. Pellegrini I, Rasolonjanahary R, Gunz G, et al. 1989 Resistance to bromocriptine in prolactinomas. *J Clin Endocrinol Metab*. 69:500–509.
9. Clossé A, Cramps M, Wanner A, Palacios JM. 1988 *In vivo* labelling of brain dopamine D<sub>2</sub> receptors using the high-affinity specific D<sub>2</sub> agonist (<sup>3</sup>H)CV 205–502. *Brain Res* 440:123–128.
10. Merola B, Sarnacchiaro F, Colao A, et al. 1994 Positive response to compound CV 205–502 in hyperprolactinemic patients resistant to or intolerant of bromocriptine. *Gynecol Endocrinol*. 8:175–181.
11. Ferrari C, Barbieri C, Caldara R, et al. 1986 Long-lasting prolactin lowering effect of cabergoline, a new dopamine agonist, in hyperprolactinemic patients. *J Clin Endocrinol Metab*. 63:941–945.
12. Ciccarelli E, Giusti M, Miola A, et al. 1989 Effectiveness and tolerability of long-term treatment with cabergoline, a new long-lasting ergoline derivative, in hyperprolactinemic patients. *J Clin Endocrinol Metab*. 69:725–728.
13. Ferrari C, Mattei A, Melis GB, et al. 1989 Cabergoline: long-acting oral treatment of hyperprolactinemic disorders. *J Clin Endocrinol Metab*. 68:2101–2106.
14. Webster J, Piscitelli G, Polli A, et al. 1992 Dose-dependent suppression of

- serum prolactin by cabergoline in hyperprolactinemia: a placebo controlled, double blind, multicentric study. *Clin Endocrinol (Oxf)*. 37:534–541.
15. Webster J, Piscitelli G, Polli A, et al. 1994 A comparison of cabergoline and bromocriptine in the treatment of hyperprolactinemic amenorrhea. *N Engl J Med*. 331:904–909.
  16. Biller BMK, Molitch ME, Vance ML, et al. 1996 Treatment of prolactin-secreting macroadenoma with once-weekly dopamine agonist cabergoline. *J Clin Endocrinol Metab*. 81:2338–2343.
  17. Strolin-Benedetti M, Dostert P, Barone D, Efthymiopoulos C, Peretti G, Roncucci R. 1990 *In vivo* interaction of cabergoline with rat brain dopamine receptors labelled with [<sup>3</sup>H]N-n-propylnorapomorphine. *Eur J Pharmacol*. 187:399–408.
  18. Eguchi K, Kawamoto K, Uozumi T, Ito A, Kurisu K. 1995 *In vivo* effect of cabergoline, a dopamine agonist, on estrogen-induced rat pituitary tumors. *Endocr J*. 42:153–161.
  19. Eguchi K, Kawamoto K, Uozumi T, Ito A, Arita K, Kurisu K. 1995 Effect of cabergoline, a dopamine agonist, on estrogen-induced rat pituitary tumors: *in vitro* culture studies. *Endocr J*. 42:162–168.

---

**Summer Institute on Aging Research  
Airlie, Virginia  
July 19–25, 1997**

The National Institute on Aging announces the annual Summer Institute on Aging Research, a week-long workshop for new investigators, focused on current issues, research methodologies, and funding opportunities. The program will also include consultations on the development of research interests. The 1997 Summer Institute will be held July 19–25 in Airlie, VA. Support is available for travel and living expenses.

**Applications are due March 24.** To increase the diversity of participants, minority investigators are encouraged to apply.

For more information write to: Zita E. Givens, National Institute on Aging, National Institutes of Health, Building 31, Room 5C-35, 31 Center Drive MSC-2292, Bethesda, Maryland 20892-2292; or Telephone: (301) 496-0765; Fax: (301) 496-2525; E-Mail: [givensz@31.nia.nih.gov](mailto:givensz@31.nia.nih.gov); WEB SITE: <http://www.nih.gov/nia>.
